# Supplementary material
Source: PubMed Central journal article supplement (PMC1413692)

**A**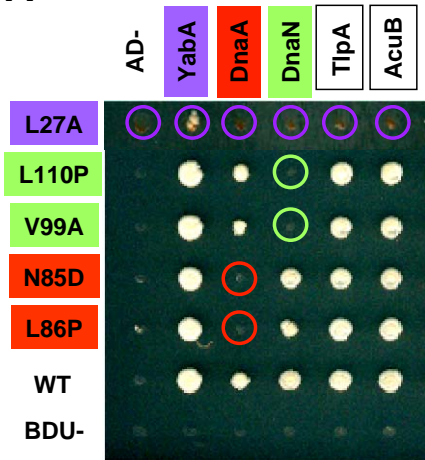**B**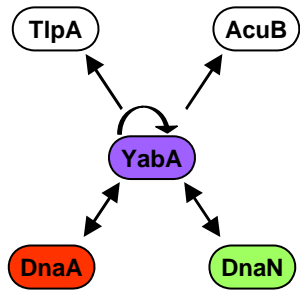

Supplement: pnas_0506914103_1.pdf [file pnas_0506914103_1.pdf]

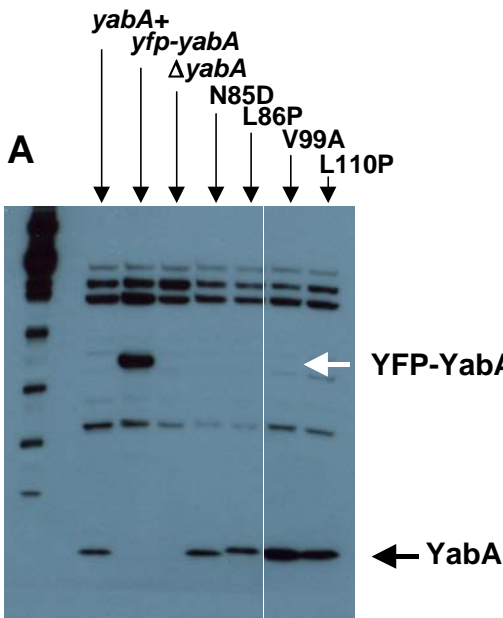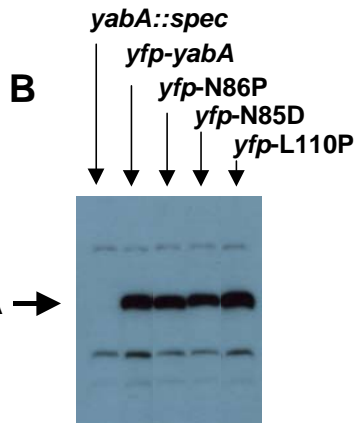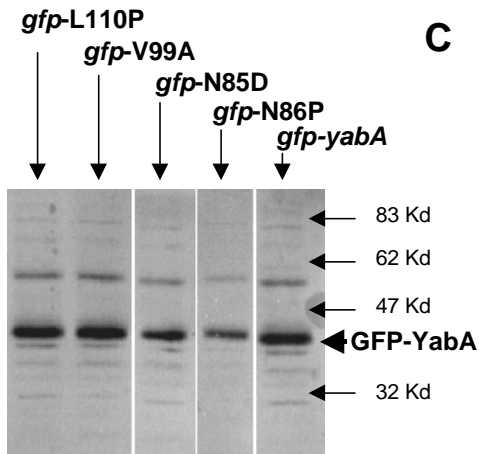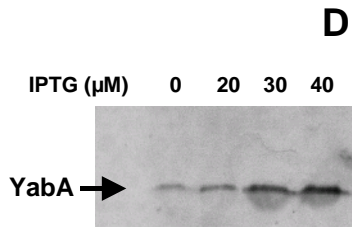

Supplement: pnas_0506914103_2.pdf [file pnas_0506914103_2.pdf]

**A**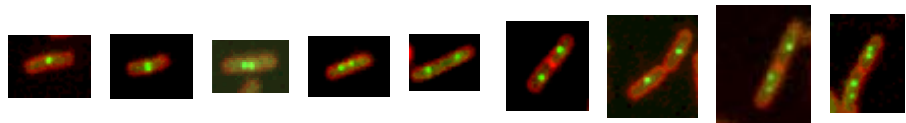

GFP-YabA foci pattern

**B**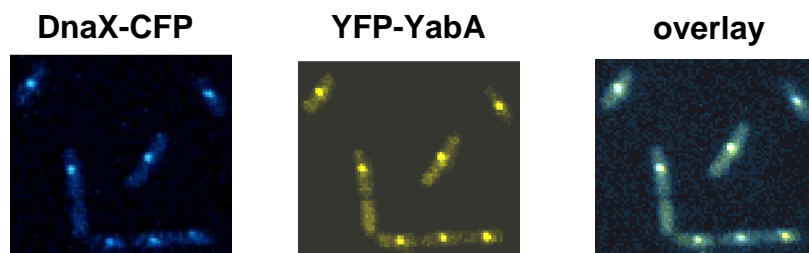**C**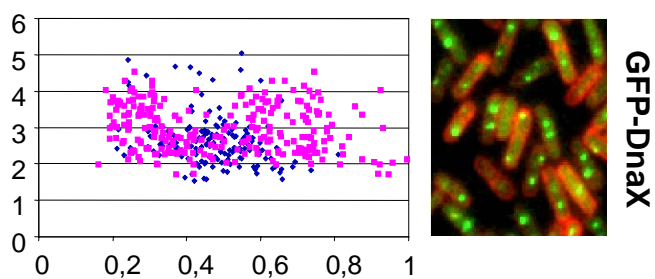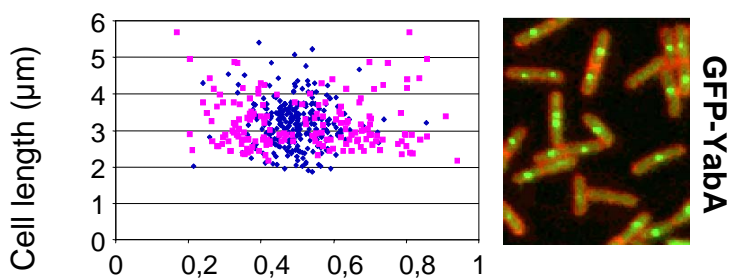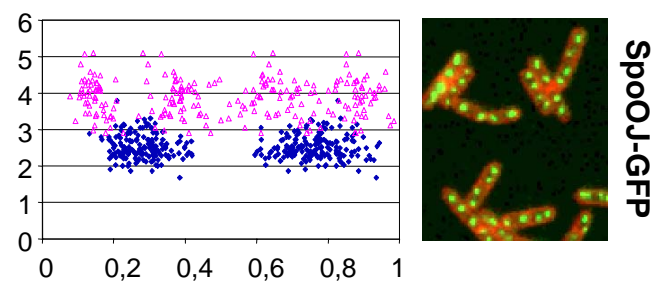

Foci position (fraction of cell length)

Supplement: pnas_0506914103_3.pdf [file pnas_0506914103_3.pdf]

## Expressed untagged YabA

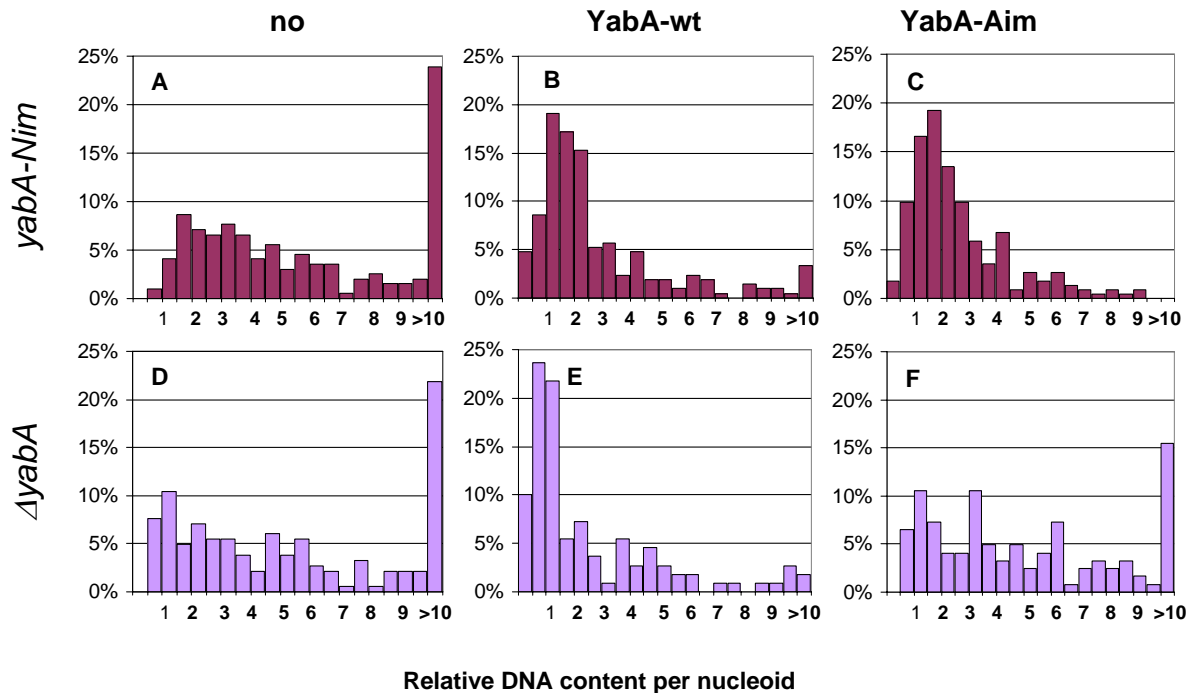

Supplement: pnas_0506914103_4.pdf [file pnas_0506914103_4.pdf]
